# Supplementary material for: Development and validation of a new Multidisciplinary Approach Competency Scale for Prevention of Child Abuse from Pregnancy (MUSCAT)
Source: PLOS journal article supplement (doi:10.1371/journal.pone.0249623), 2021-04-06
Supplement: S2 (10.1371/journal.pone.0249623.s002) [file journal.pone.0249623.s002.docx]

MUSCAT-J ： Japanese versions of the Multidisciplinary Approach Competency
Scale for Prevention of Child Abuse from Pregnancy

日本語版妊娠期からの虐待予防のための多職種連携能力評価尺度

各項目について、評価してください。

| 領域 | No | 項目 | 3  あ て は ま る | 2  や や あ て は ま る | 1  や や あ て は ま ら な い | 0  あ て は ま ら な い |
| --- | --- | --- | --- | --- | --- | --- |
| Ⅰ 協働的 ネットワーキング | 1 | ハイリスク養育者・子どもへの支援に関する多職種  間の葛藤に対し適切に対処できる | 3 | 2 | 1 | 0 |
| 2 | ハイリスク養育者・子どもの支援方針・計画につい  て他職種と合意を図れる | 3 | 2 | 1 | 0 |
| 3 | 虐待予防支援チームにおける各専門職の役割分  担を明確に認識できる | 3 | 2 | 1 | 0 |
| 4 | 虐待予防にむけた緊急時の対応を可能にするため  の他職種との報告・連絡・相談体制を整えられる | 3 | 2 | 1 | 0 |
| 5 | ハイリスク養育者の将来における生活の希望を他  職種と共有できる | 3 | 2 | 1 | 0 |
| Ⅱ 専門的 コミットメント | 6 | ハイリスク養育者・子どもと専門職における信頼関  係の必要性についてわかる | 3 | 2 | 1 | 0 |
| 7 | ハイリスク養育者・子どもに関する個人情報を適切 に管理できる | 3 | 2 | 1 | 0 |
| 8 | ハイリスク養育者の可能性がある対象者と判断し  た場合、速やかに多職種と情報共有できる | 3 | 2 | 1 | 0 |
| 9 | 子どもの権利擁護の精神にのっとり、虐待予防に  携わることができる | 3 | 2 | 1 | 0 |
| 10 | 虐待予防にむけた平時の多職種間での連携・調整  の必要性についてわかる | 3 | 2 | 1 | 0 |
| No.1～10 合計 | | | 点 | | | |

Sakakida C, Tadaka E, Arimoto A：Development and Validation of a New Multidisciplinary Approach

Competency Scale for Prevention of Child Abuse from Pregnancy (MUSCAT) . PLOS ONE,2021

doi:10.1371/journal.pone.0249623
